# Supplementary material for: Usp7 regulates Hippo pathway through deubiquitinating the transcriptional coactivator Yorkie
Source: PubMed Central journal article supplement (PMC6345853; doi:10.1038/s41467-019-08334-7), 2019-01-24
Supplement: 41467_2019_8334_MOESM1_ESM.pdf [file 41467_2019_8334_MOESM1_ESM.pdf]

## **Supplementary Information**

Usp7 regulates Hippo pathway through deubiquitinating the transcriptional

coactivator Yorkie

Sun et al.



(green). Of note, knockdown of *usp7* apparently decreased CycE level (below the red dashed line). **e** A wing disc expression *usp7* RNAi by *En-gal4* was stained to show Ci (green) and *diap1-lacZ* (white). **f** A wing disc expressing *usp7* RNAi by *ApG4* was stained to show GFP (green), *diap1-lacZ* (red) and Ci (white). Of note, knockdown of *usp7* equally decreased *diap1-lacZ* in the A and P compartments. **g** Immunoblots of control embryos and *usp7<sup>KG06814</sup>* homozygote mutant embryos. *usp7<sup>KG06814</sup>* was balanced with *FM7.Kr-GFP* and embryos loss of GFP signals were homozygotes. **h** *usp7* mutant clones showed growth defect. The control clones (FRT19A/FRT19A) and *usp7<sup>KG06814</sup>* mutant clones were marked by loss of GFP. Quantification of the ratios of GFP<sup>-/-</sup> area/GFP<sup>+/+</sup> area (clones/twin spots) of wing discs and eye discs were shown on the right. Data are means ± SEM. n=10 biological independent discs. \*\*P < 0.01 by student's *t*-test. **i** Semi-quantitative RT-PCR analysis was performed to examine the expression of *usp7* in distinct developmental stages of *Drosophila*. Of note, *usp7* steadily expresses from egg to adult. *actin* acts as a loading control. **j** A wing disc overexpressing *yki-SA* was stained to show GFP (green) and Usp7 (white). Scale bars: 50µm for all images.

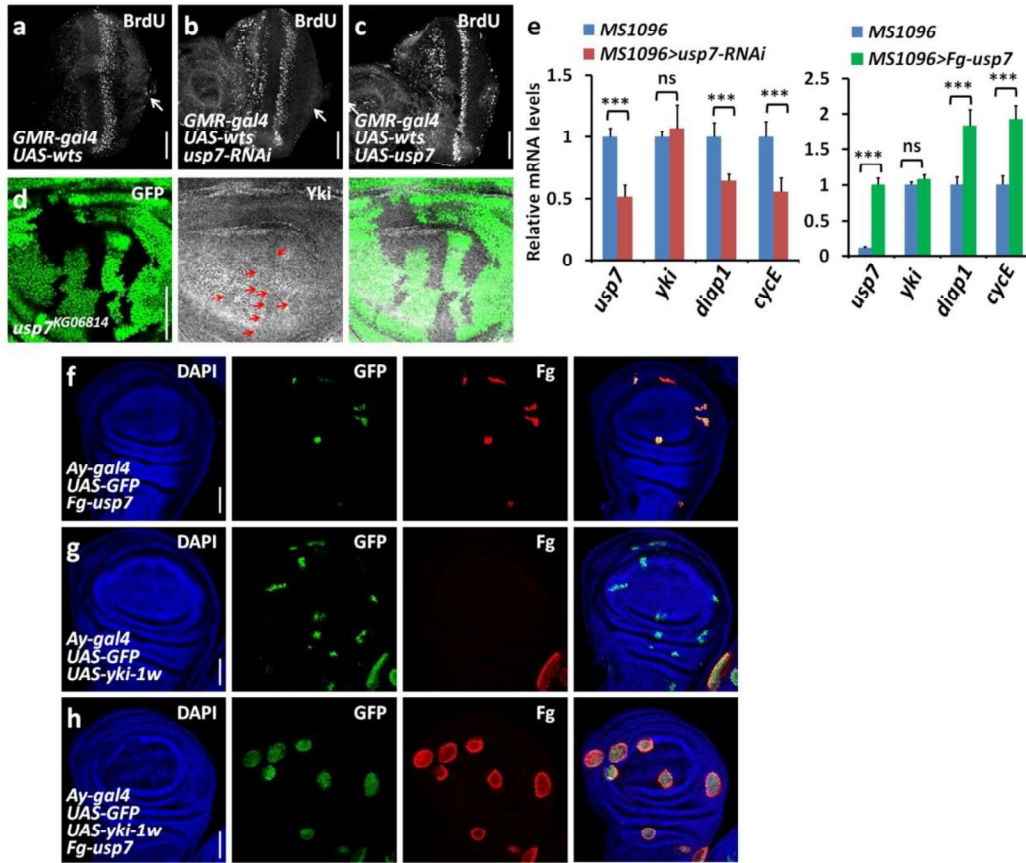

**Supplementary Figure 2.** Usp7 regulates Hippo pathway upstream of Yki. **a** A control eye disc was stained to show BrdU incorporation. Of note, some cells showed BrdU positive (arrow). **b-c** Knockdown of *usp7* decreased, while overexpression of *usp7* increased BrdU incorporation in the posterior regions (arrows). **d** A wing disc carrying *usp7*<sup>KG06814</sup> clones were stained to show the expression of GFP (green) and Yki (white). Of note, *usp7* mutation resulted in Yki expression decreased (arrows). **e** Relative mRNA levels of *usp7*, *yki*, *diap1* and *cycE* from indicated wing discs were revealed by real-time PCR. Data are means  $\pm$  SEM. n=3 biological independent experiments. ns, not significant, \*\*\*P < 0.001 by student's *t*-test. **f** A wing disc expressing Fg-*usp7* by *Ay-gal4* (*act>y+>gal4*) was stained to show DAPI (blue), GFP

(green) and Fg (red). GFP marks the Fg-*usp7*-overexpressing clones. **g** A wing disc expressing *yki-1w* was stained to show DAPI (blue), GFP (green) and Fg (red). **h** Simultaneous expression of *yki-1w* and *usp7* produced larger and rounder clones. Scale bars: 50 $\mu$ m for all images.

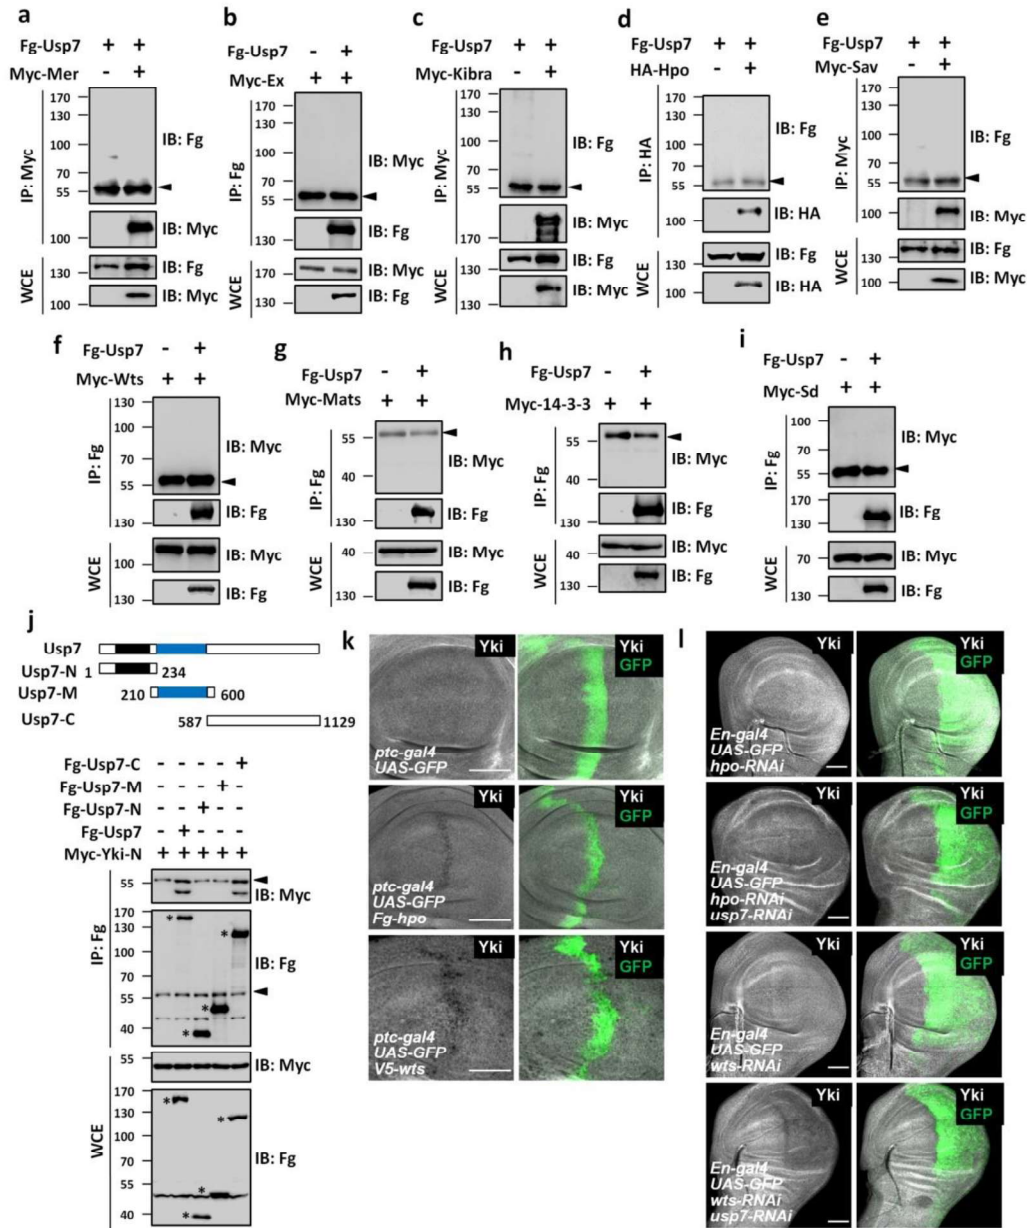

**Supplementary Figure 3. Usp7 does not bind many components of Hippo signaling.**

**a** Immunoblots of immunoprecipitates (top two panels) or lysates (bottom two panels)

from S2 cells expressing indicated proteins. Usp7 did not show any interaction with Mer. **b** Usp7 did not bind Ex. **c** Usp7 did not bind Kibra. **d** Usp7 did not bind Hpo. **e** Usp7 did not bind Sav. **f** Usp7 did not bind Wts. **g** Usp7 did not bind Mats. **h** Usp7 did not bind 14-3-3. **i** Usp7 did not bind Sd. **j** Myc-Yki-N interacted with the C-terminal region of Usp7. Asterisks marked the truncated Usp7 proteins. All above, the arrowhead indicated heavy IgG. **k** Overexpression of *hpo* or *wts* decreased Yki protein, which was rescued by simultaneous *usp7* overexpression. **l** Knockdown of *hpo* or *wts* elevated Yki protein, which was restored by *usp7* knockdown. Scale bars: 50µm for all images.



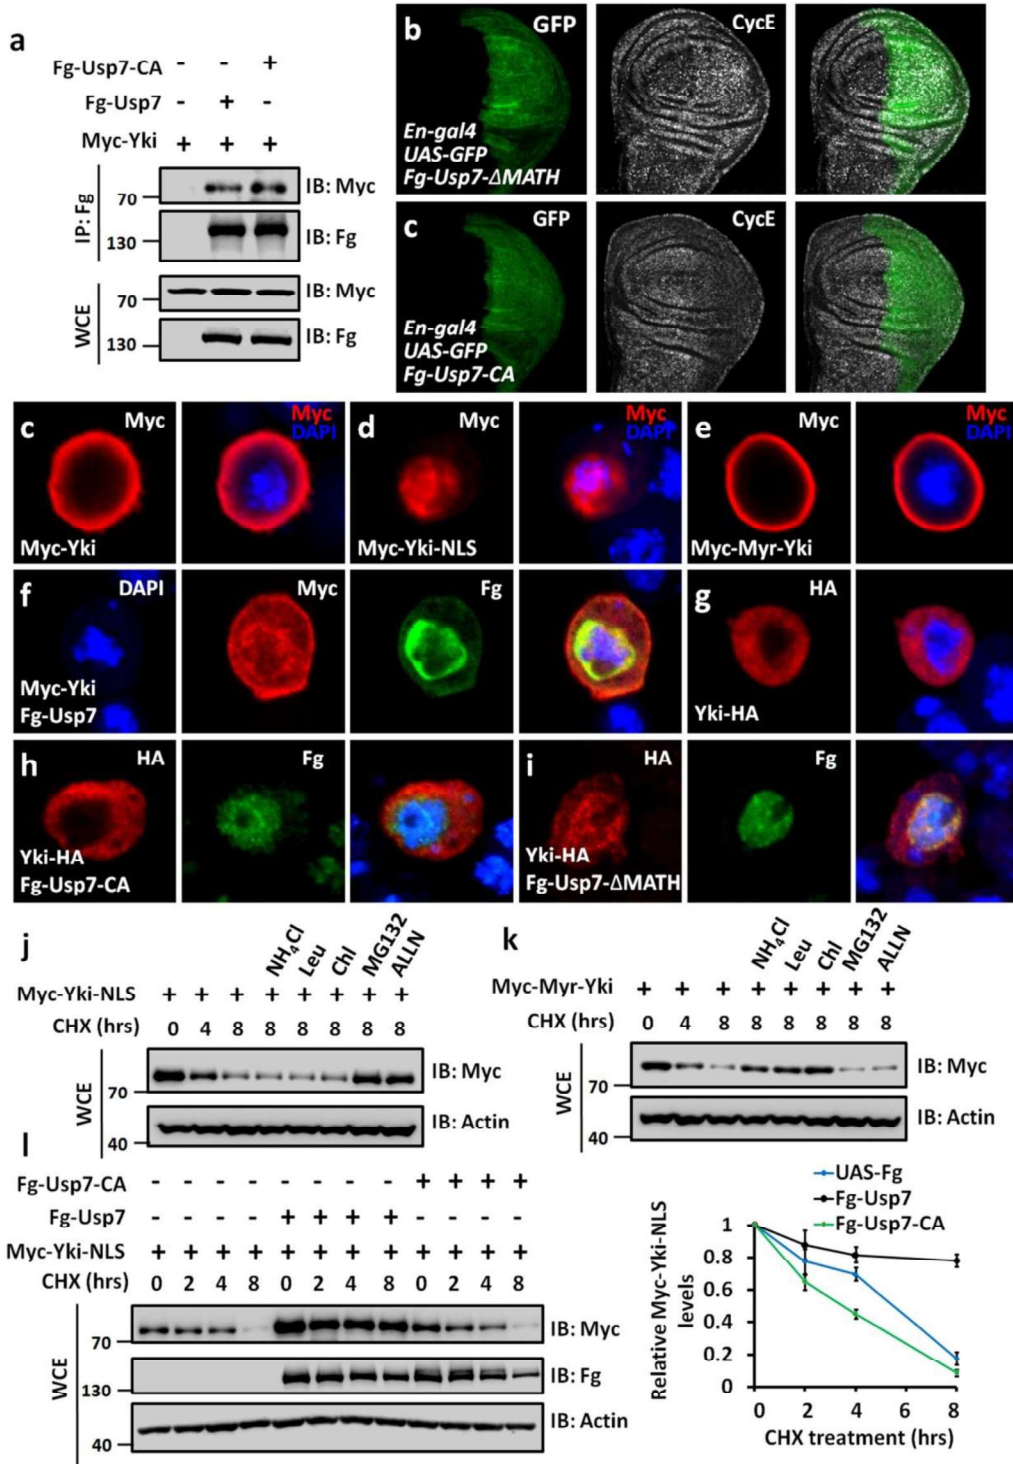

**Supplementary Figure 4.** Usp7 stabilizes the nuclear Yki via its deubiquitinase activity. **a** Immunoblots of immunoprecipitates (top two panels) or lysates (bottom two panels) from S2 cells expressing indicated proteins. Both Usp7 and Usp7-CA

could bind Yki. **b** A wing disc expressing *usp7-ΔMATH* was stained to show GFP (green) and CycE (white). Overexpression of *usp7-ΔMATH* caused CycE elevation. **c** A wing disc expressing *usp7-CA* was stained to show GFP (green) and CycE (white). Overexpression of *usp7-CA* decreased CycE level. **c** A S2 cell transfected with Myc-Yki was stained to show Myc (red) and DAPI (blue). **d** Myc-Yki-NLS exclusively localized in the nucleus. **e** Myc-Myr-Yki only localized in the cytoplasm. **f** S2 cells co-expressing Myc-Yki and Fg-Usp7 proteins were stained to show DAPI (blue), Myc (red) and Fg (green). Notably, Usp7 promoted Yki nuclear accumulation. **g** Yki-HA protein mainly localized in the cytoplasm. **h** Usp7-CA failed to promote Yki protein nuclear accumulation. **i** Usp7-ΔMATH could promote Yki protein nuclear accumulation. **j** S2 cells transfected with Myc-Yki-NLS were treated with CHX plus distinct inhibitors for indicated intervals. NH<sub>4</sub>Cl, leupeptin (Leu) and chloroquine (Chl) were lysosome inhibitors. MG132 and ALLN were proteasome inhibitors. Of note, MG132 and ALLN could hamper Myc-Yki-NLS degradation. **k** S2 cells transfected with Myc-Myr-Yki were treated with CHX plus distinct inhibitors for indicated intervals. Notably, Myr-Yki was degraded by lysosome. **l** Immunoblots of lysates from S2 cells expressing indicated constructs and treated with CHX for indicated intervals. Quantification analyses were shown on right of the autoradiogram. The results were presented as means ± SEM of values from three independent experiments. Above all, Actin acts as a loading control.



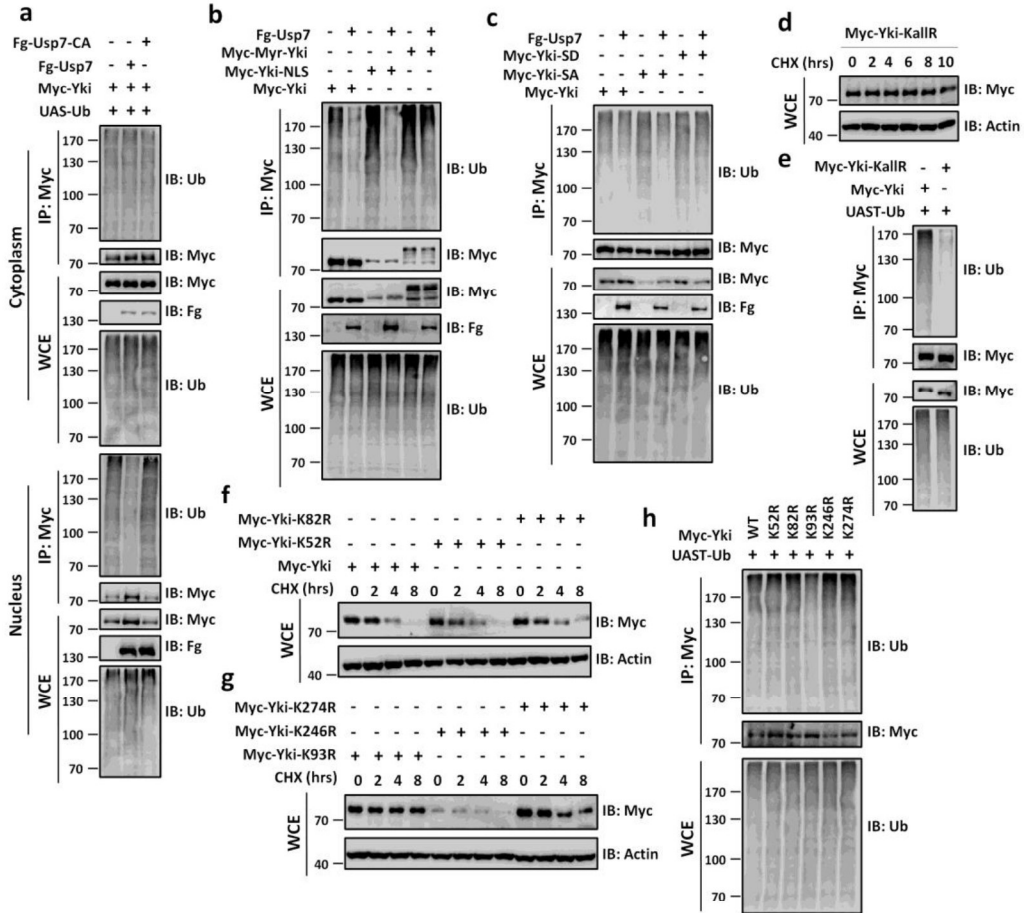

**Supplementary Figure 5. Usp7 deubiquitinates the nuclear Yki protein.** **a** Usp7 mainly deubiquitinated nuclear Yki protein. S2 cells transfected by indicated constructs were analyzed by subcellular fractionation. Before cell harvesting, cells were treated by  $\text{NH}_4\text{Cl}$  and MG132 for 4hrs. **b** Usp7 effectively deubiquitinated Yki-NLS, not Myr-Yki. Before cell harvesting, cells were treated by  $\text{NH}_4\text{Cl}$  and MG132 for 4hrs. **c** Usp7 robustly removed ubiquitin chains from Yki and Yki-SA, not Yki-SD. Before cell harvesting, cells were treated by  $\text{NH}_4\text{Cl}$  and MG132 for 4hrs. **d** S2 cell transfected by Myc-Yki-KallR were treated by CHX for indicated intervals. Of note, Myc-Yki-KallR was stable. Actin acts as a loading control. **e** Myc-Yki-KallR failed to be ubiquitinated. Before cell harvesting, cells were treated by  $\text{NH}_4\text{Cl}$  and

MG132 for 4hrs. **f-g** S2 cells transfected with indicated Yki mutant constructs were treated by CHX for indicated intervals. Notably, mutation of K93 hampered Yki degradation. Actin acts as a loading control. **h** Mutation of K93 on Yki inhibited its ubiquitination. Before cell harvesting, cells were treated by NH<sub>4</sub>Cl and MG132 for 4hrs.

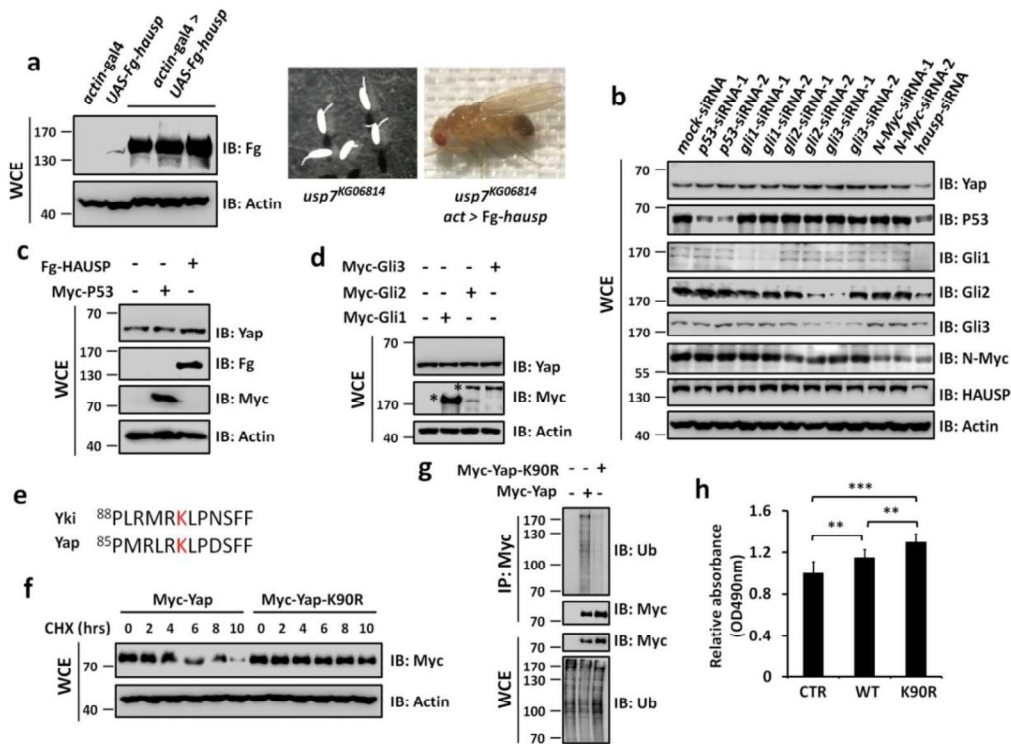

**Supplementary Figure 6.** HAUSP plays a conserved role to deubiquitinate Yap. **a** Overexpression of *hausp* could rescue the lethality by *usp7* mutation in *Drosophila*. Flies from indicated genotypes were lysed by cell lysis buffer and then underwent IB assay. Actin acts as a loading control. Of note, *usp7<sup>KG06814</sup>* homozygotes (GFP negative embryos from *usp7<sup>KG06814</sup>/FM7. Kr-GFP*) were embryonic lethality, which were restored by *hausp* expression. **b** Immunoblots of Huh7 cells transfected with indicated siRNAs. Of note, knockdown of HAUSP targets did not decrease Yap

protein level. Actin acts as a loading control. **c-d** Immunoblots of 293T cells transfected by indicated constructs. Overexpression HAUSP target genes did not show any effect on Yap protein. Actin acts as a loading control. **e** K93 on Yki protein was conserved in human Yap. **f** 293T cells transfected with Myc-Yap or Myc-Yap-K90R treated with CHX for indicated intervals. Notably, Yap-K90R showed slower degradation than wild type Yap. Actin acts as a loading control. **g** Ubiquitination assays of 293T cells transfected with indicated constructs. Yap-K90R showed lower ubiquitination than wild type Yap. Before cell harvesting, cells were treated by NH<sub>4</sub>Cl plus MG132 for 4hrs. **h** MTT assays of Huh7 cells transfected with wild type Yap or Yap-K90R. Notably, Yap-K90R showed higher efficiency in promoting cell proliferation than wild type Yap. Data are means  $\pm$  SEM. n=3 biological independent experiments. ns, not significant, \*\*P < 0.01 and \*\*\*P < 0.001 by student's *t*-test.



numbers marked HAUSP increased cases, while the blue numbers marked Yap increased cases. **b** Immunoblots of lysates from Huh7 cells expressing indicated constructs or siRNAs. Of note, *hausp*-siRNA and *yap*-siRNA could effectively silence the endogenous genes. Actin acts as a loading control. **c** The proliferation of 7721 cells treated with P5091 at indicated concentrations for 24hrs. **d** The proliferation of 7721 cells and Huh7 cells treated by Usp7-IN-1 or HBX19818 at indicated concentrations for 24hrs. Above all data are means  $\pm$  SEM. n=3 biological independent experiments. \*\*\* P < 0.001 by student's *t*-test.

Supplementary Figure 8

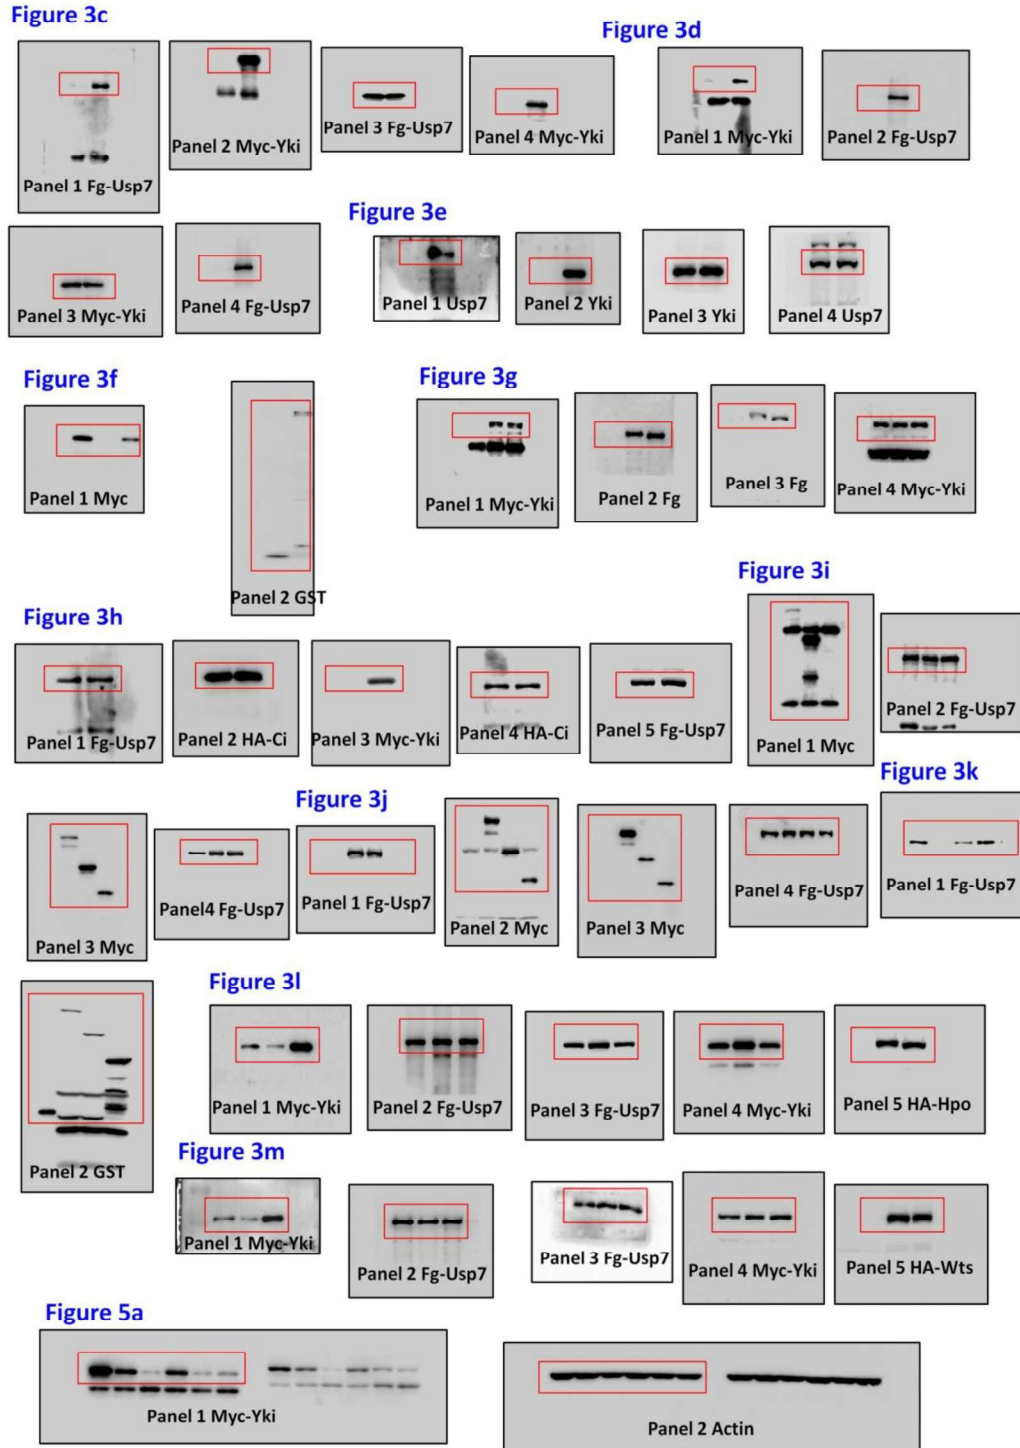

Original immunoblotting figures

Figure 5b

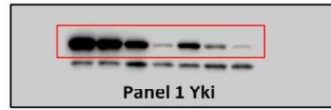

Panel 1 Yki

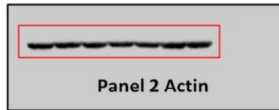

Panel 2 Actin

Figure 5c

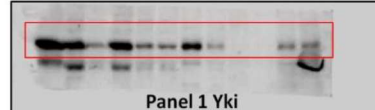

Panel 1 Yki

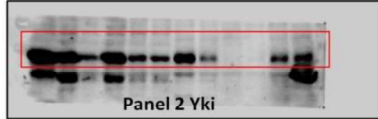

Panel 2 Yki

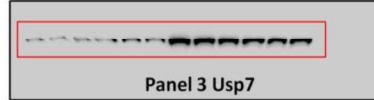

Panel 3 Usp7

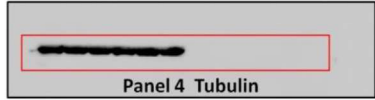

Panel 4 Tubulin

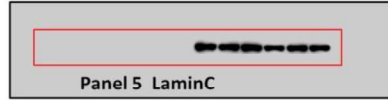

Panel 5 LaminC

Figure 5d

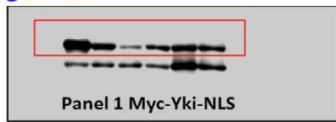

Panel 1 Myc-Yki-NLS

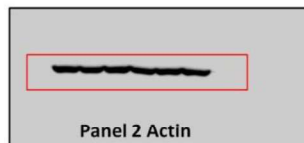

Panel 2 Actin

Figure 5e

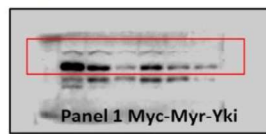

Panel 1 Myc-Myr-Yki

Figure 5f

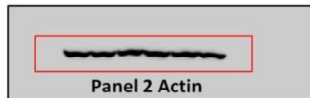

Panel 2 Actin

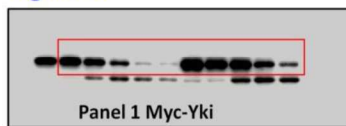

Panel 1 Myc-Yki

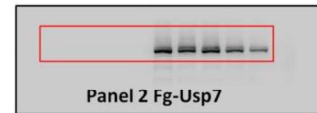

Panel 2 Fg-Usp7

Figure 5g

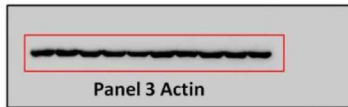

Panel 3 Actin

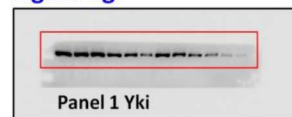

Panel 1 Yki

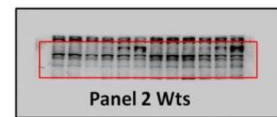

Panel 2 Wts

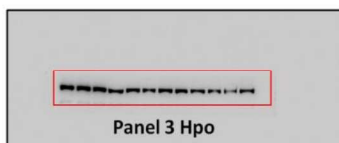

Panel 3 Hpo

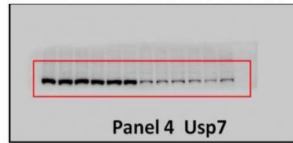

Panel 4 Usp7

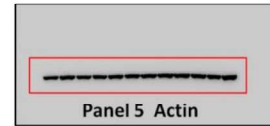

Panel 5 Actin

Figure 5h

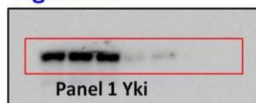

Panel 1 Yki

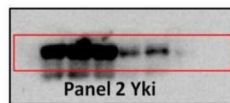

Panel 2 Yki

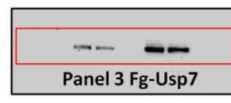

Panel 3 Fg-Usp7

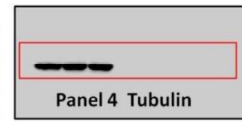

Panel 4 Tubulin

Figure 5i

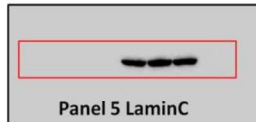

Panel 5 LaminC

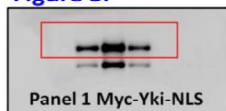

Panel 1 Myc-Yki-NLS

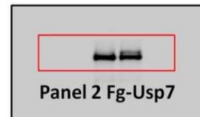

Panel 2 Fg-Usp7

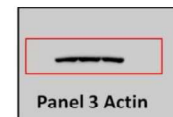

Panel 3 Actin

Original immunoblotting figures



**Figure 5j**

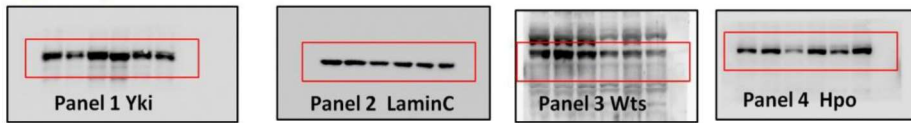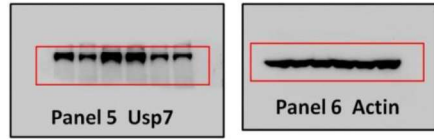

**Figure 5k**

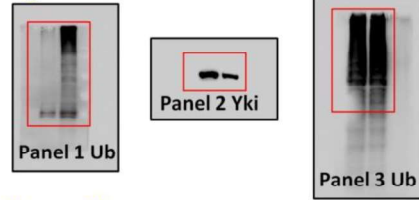

**Figure 5l**

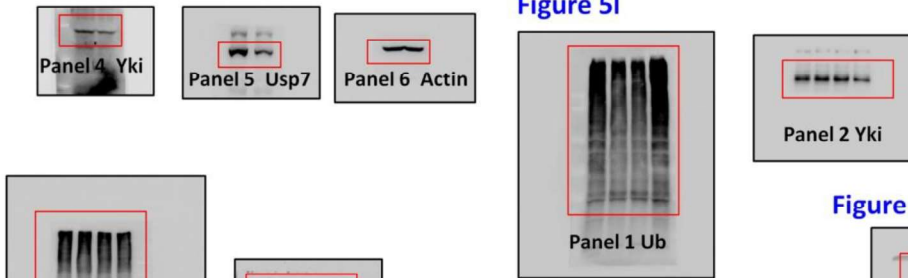

**Figure 5m**

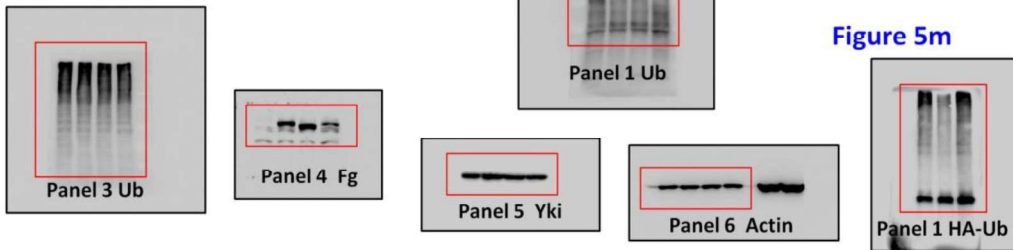

**Figure 6e**

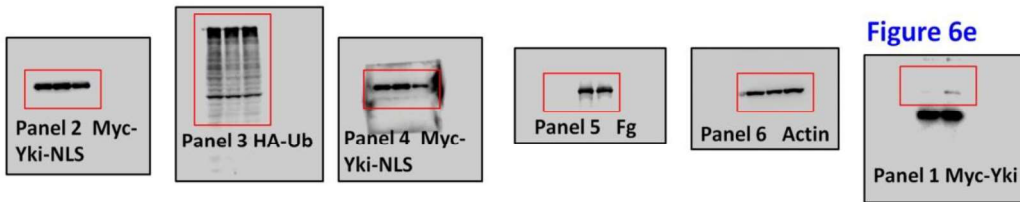

**Figure 6f**

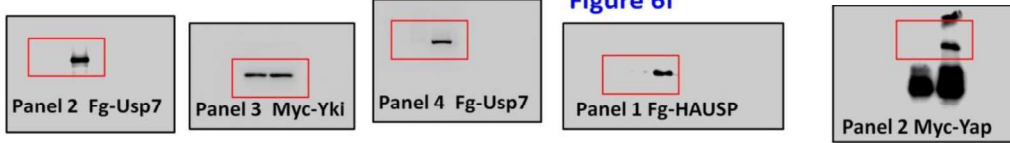

**Figure 6g**

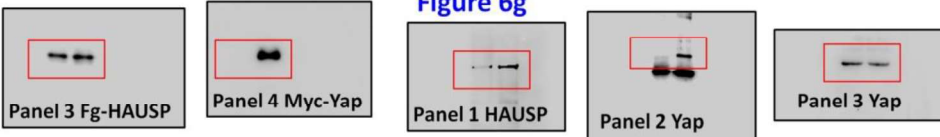

**Figure 6h**

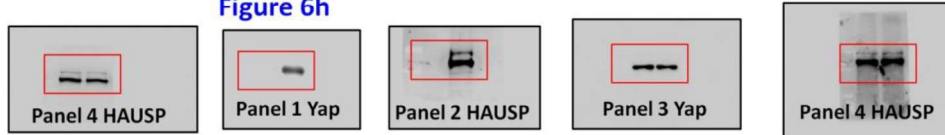

Original immunoblotting figures

**Figure 6i**

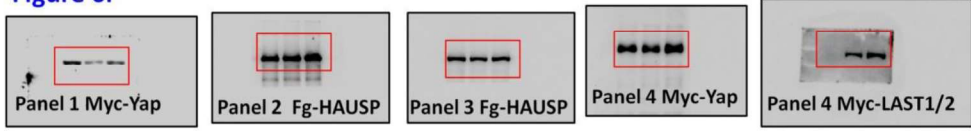

**Figure 6j**

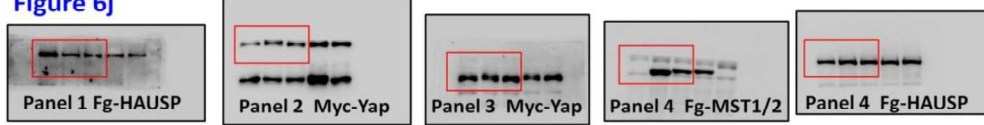

**Figure 6k**

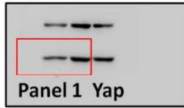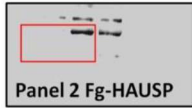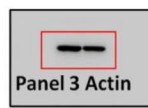

**Figure 6l**

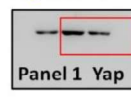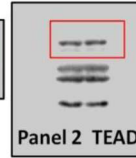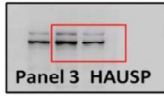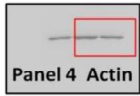

**Figure 6m**

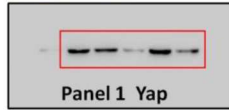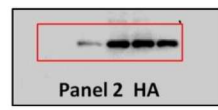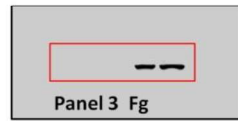

**Figure 6n**

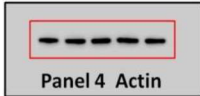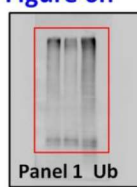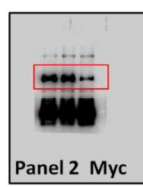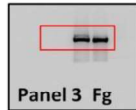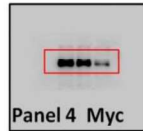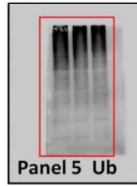

**Figure 6o**

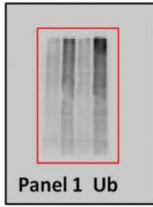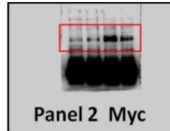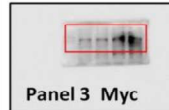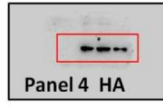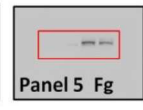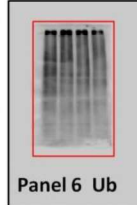

**Figure 6p**

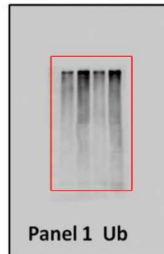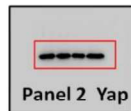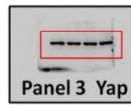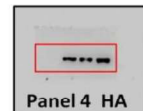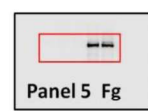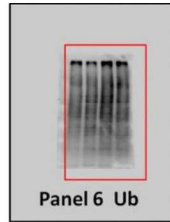

Original immunoblotting figures

Figure 7h

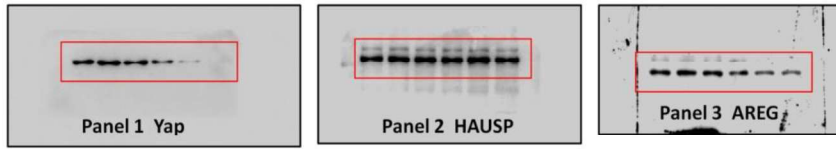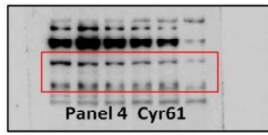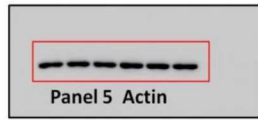

Figure 7k

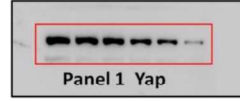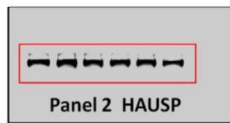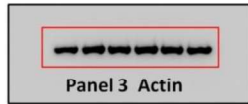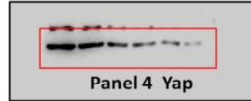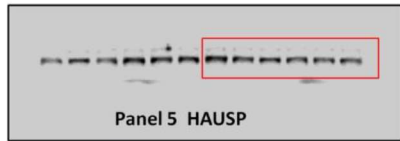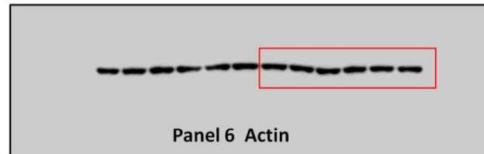

Figure 7l

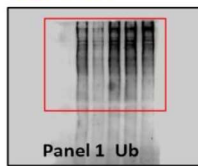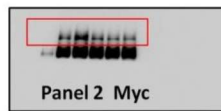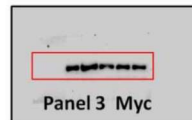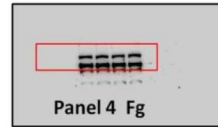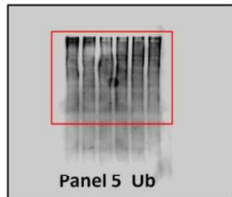

Figure S1g

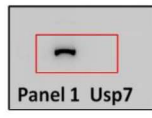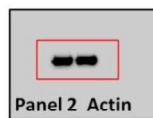

Figure S3a

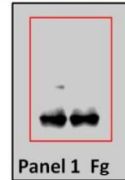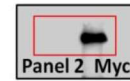

Figure S3b

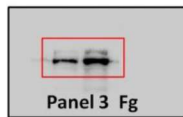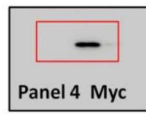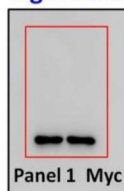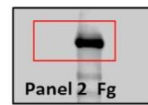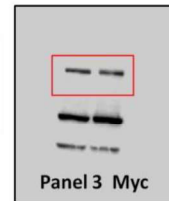

Figure S3c

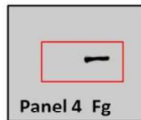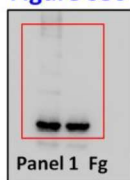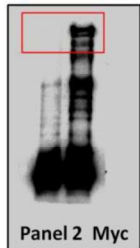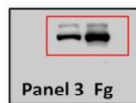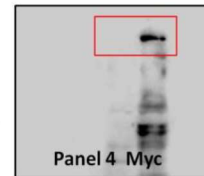

Original immunoblotting figures

Figure S3d

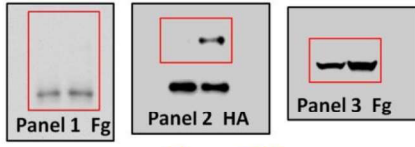

Figure S3e

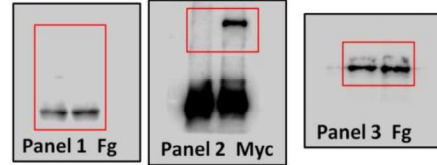

Figure S3f

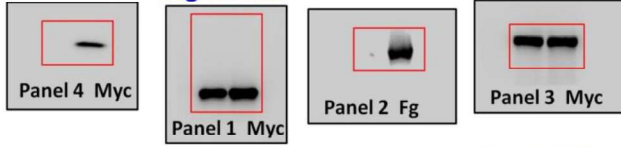

Figure S3g

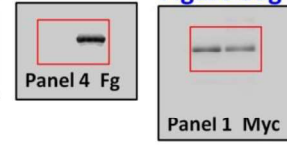

Figure S3h

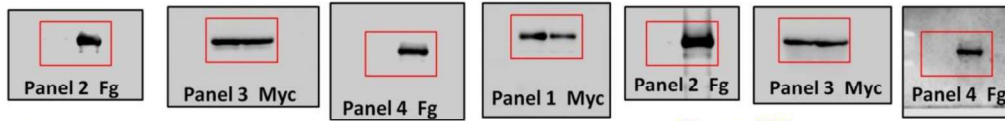

Figure S3i

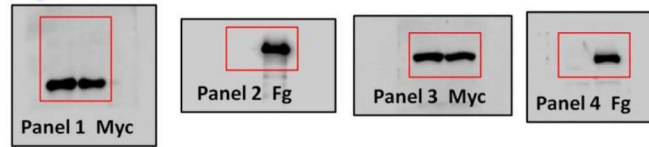

Figure S3j

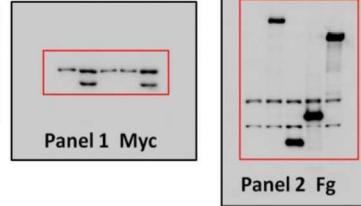

Figure S4a

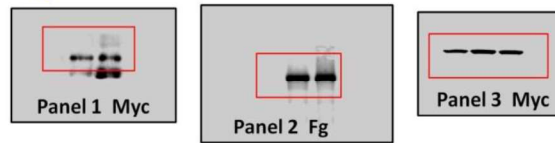

Figure S4j

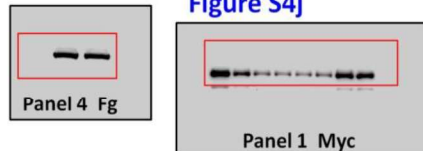

Figure S4k

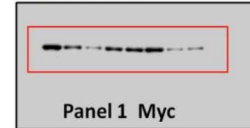

Figure S4l

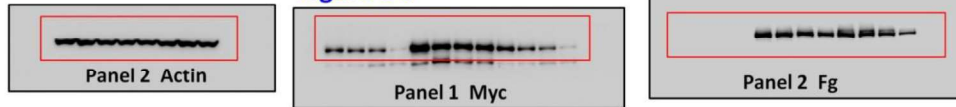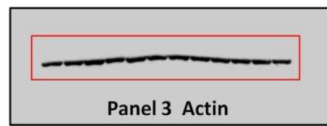

Original immunoblotting figures

**Figure S5a**

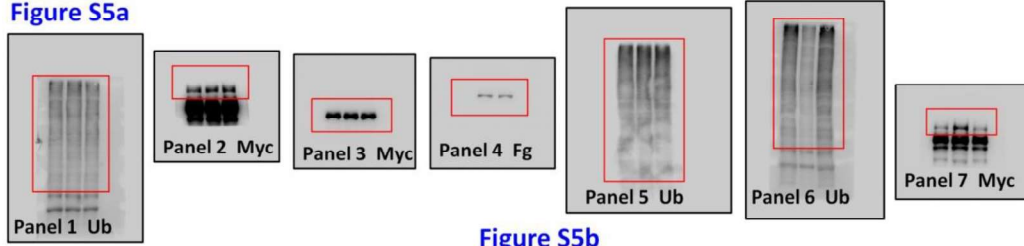

**Figure S5b**

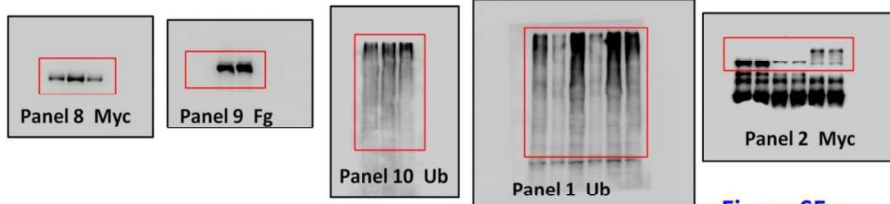

**Figure S5c**

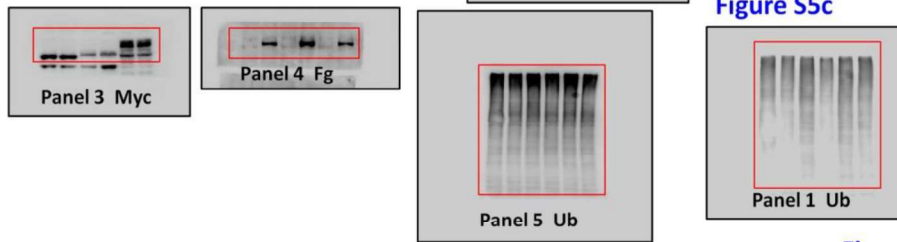

**Figure S5d**

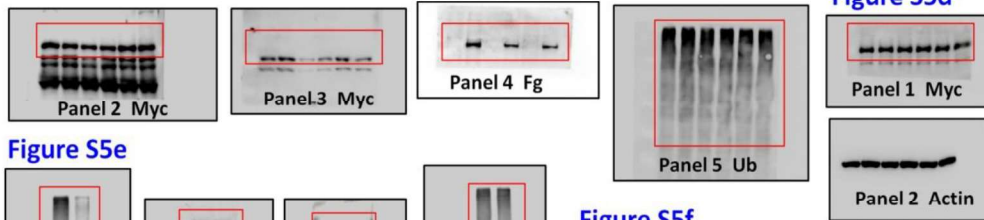

**Figure S5e**

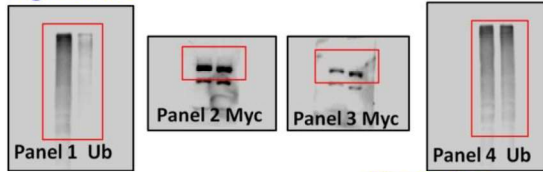

**Figure S5f**

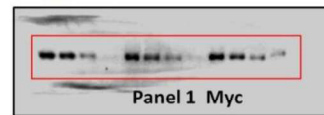

**Figure S5g**

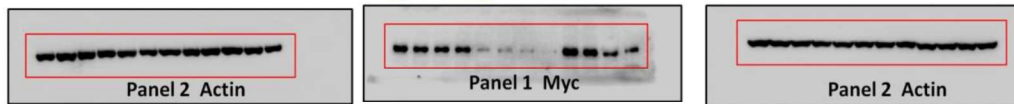

**Figure S5h**

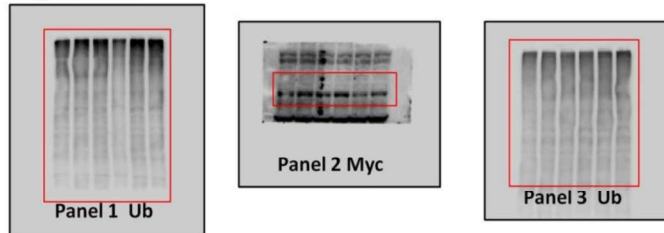

Original immunoblotting figures

**Figure S6a**

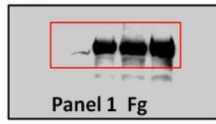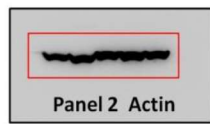

**Figure S6b**

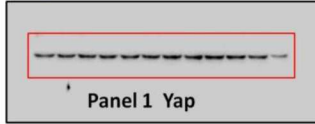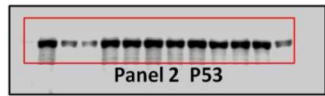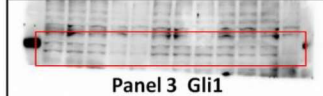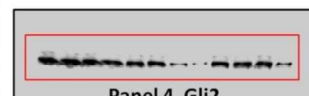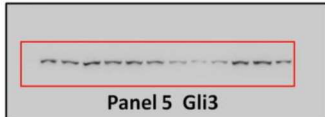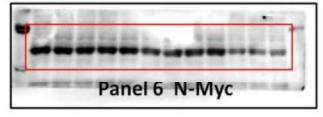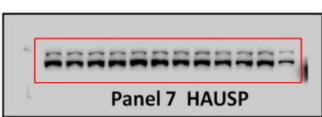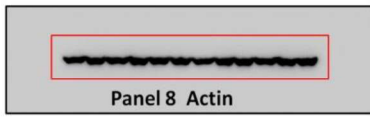

**Figure S6c**

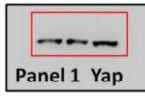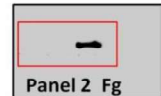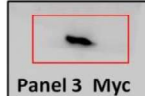

**Figure S6d**

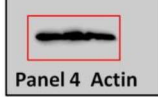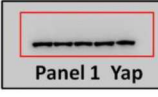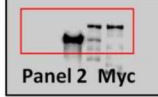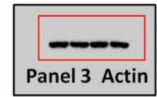

**Figure S6f**

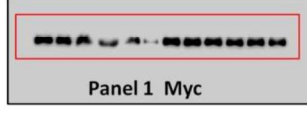

**Figure S6g**

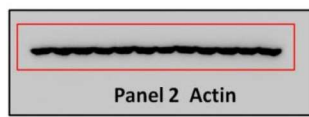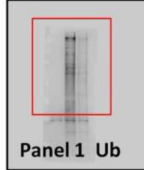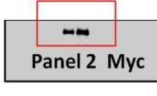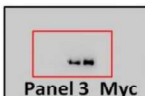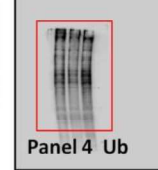

Original immunoblotting figures
